# Supplementary material for: Persistent Endothelial Dysfunction in Post-Acute COVID-19 Syndrome: A Case-Control Study
Source: MDPI journal article supplement (doi:10.3390/biomedicines9080957), 2021-08-04
Supplement: s1 [file s1]

## Supplementary online material

### **Persistent Endothelial Dysfunction in Post-Acute COVID-19 Syndrome:**

#### **A Case-Control Study.**

Pasquale Ambrosino, **MD PhD**<sup>1\*</sup> Ilenia Calcaterra, **MD**<sup>2\*</sup>

Antonio Molino, **MD**<sup>3</sup> Pasquale Moretta, **PsyD**<sup>1</sup> Roberta Lupoli, **MD PhD**<sup>4</sup>

Giorgio Alfredo Spedicato, **PhD FCAS FSA CSPA CStat**<sup>5</sup> Antimo Papa, **MD**<sup>1</sup>

Andrea Motta, **PhD**<sup>5</sup> Mauro Manisclaco, **MD PhD**<sup>1\*\*</sup> Matteo Nicola Dario Di Minno, **MD PhD**<sup>6\*\*</sup>

\*The two Authors equally contributed to the manuscript.

\*\*The two Authors share co-seniorship.

<sup>1</sup> Istituti Clinici Scientifici Maugeri IRCCS, 27100 Pavia, Italy;

<sup>2</sup> Department of Clinical Medicine and Surgery, Federico II University, 80131 Naples, Italy;

<sup>3</sup> Department of Respiratory Medicine, Federico II University, 80131 Naples, Italy;

<sup>4</sup> Department of Molecular Medicine and Medical Biotechnology, Federico II University, 80131 Naples, Italy;

<sup>5</sup> Department of Data Analytics and Actuarial Science, Unipol Group, 40128 Bologna, Italy;

<sup>5</sup> Institute of Biomolecular Chemistry, National Research Council, ICB-CNR, 80078 Pozzuoli, Naples, Italy.;

<sup>6</sup> Department of Translational Medical Sciences, Federico II University, 80131 Naples, Italy.

#### **Table of contents**

|                  |                                                                                                                                                                                                                                                                 |
|------------------|-----------------------------------------------------------------------------------------------------------------------------------------------------------------------------------------------------------------------------------------------------------------|
| <b>Table S1</b>  | <b>Demographic and clinical characteristics of convalescent coronavirus disease 2019 (COVID-19) patients and controls: subgroup analysis in female gender.</b>                                                                                                  |
| <b>Table S2</b>  | <b>Correlation between flow-mediated dilation (FMD) and pulmonary function tests (PFTs) after adjusting for gender, age, hypertension, hypercholesterolemia, diabetes, smoking habit, obesity, and previous cardiovascular events: a multivariate analysis.</b> |
| <b>Figure S1</b> | <b>Flow chart of study participants.</b>                                                                                                                                                                                                                        |

**Table S1. Demographic and clinical characteristics of convalescent coronavirus disease 2019 (COVID-19) patients and controls: subgroup analysis in female gender.**

| Variable                 | Post-COVID-19<br>n = 133 | Controls<br>n = 133 | <i>p</i> Value |
|--------------------------|--------------------------|---------------------|----------------|
| Age (Years)              | 62.8 ± 9.7               | 61.2 ± 11.1         | 0.583          |
| Age > 65 Years (%)       | 48.0                     | 42.3                | 0.781          |
| Smoking Habit (%)        | 0                        | 0                   | -              |
| Hypertension (%)         | 56.0                     | 61.5                | 0.779          |
| Hypercholesterolemia (%) | 4.0                      | 0                   | 0.490          |
| Diabetes Mellitus (%)    | 8.0                      | 15.4                | 0.668          |
| Obesity (%)              | 24.0                     | 19.2                | 0.743          |

**Table S2. Correlation between flow-mediated dilation (FMD) and pulmonary function tests (PFTs) after adjusting for gender, age, hypertension, hypercholesterolemia, diabetes, smoking habit, obesity, and previous cardiovascular events: a multivariate analysis.**

| PFTs               | $\beta$ | <i>p</i> Value |
|--------------------|---------|----------------|
| PaO <sub>2</sub>   | 0.191   | 0.008          |
| FEV <sub>1</sub> % | 0.291   | < 0.001        |
| FVC%               | 0.288   | < 0.001        |
| DLCO%              | 0.225   | 0.016          |

**PaO<sub>2</sub>:** arterial oxygen tension; **FEV<sub>1</sub>%:** forced expiratory volume in 1 s (% predicted); **FVC%:** forced vital capacity (% predicted); **DLCO%:** diffusion capacity for carbon monoxide (% predicted).

**Figure S1. Flow chart of study participants.**

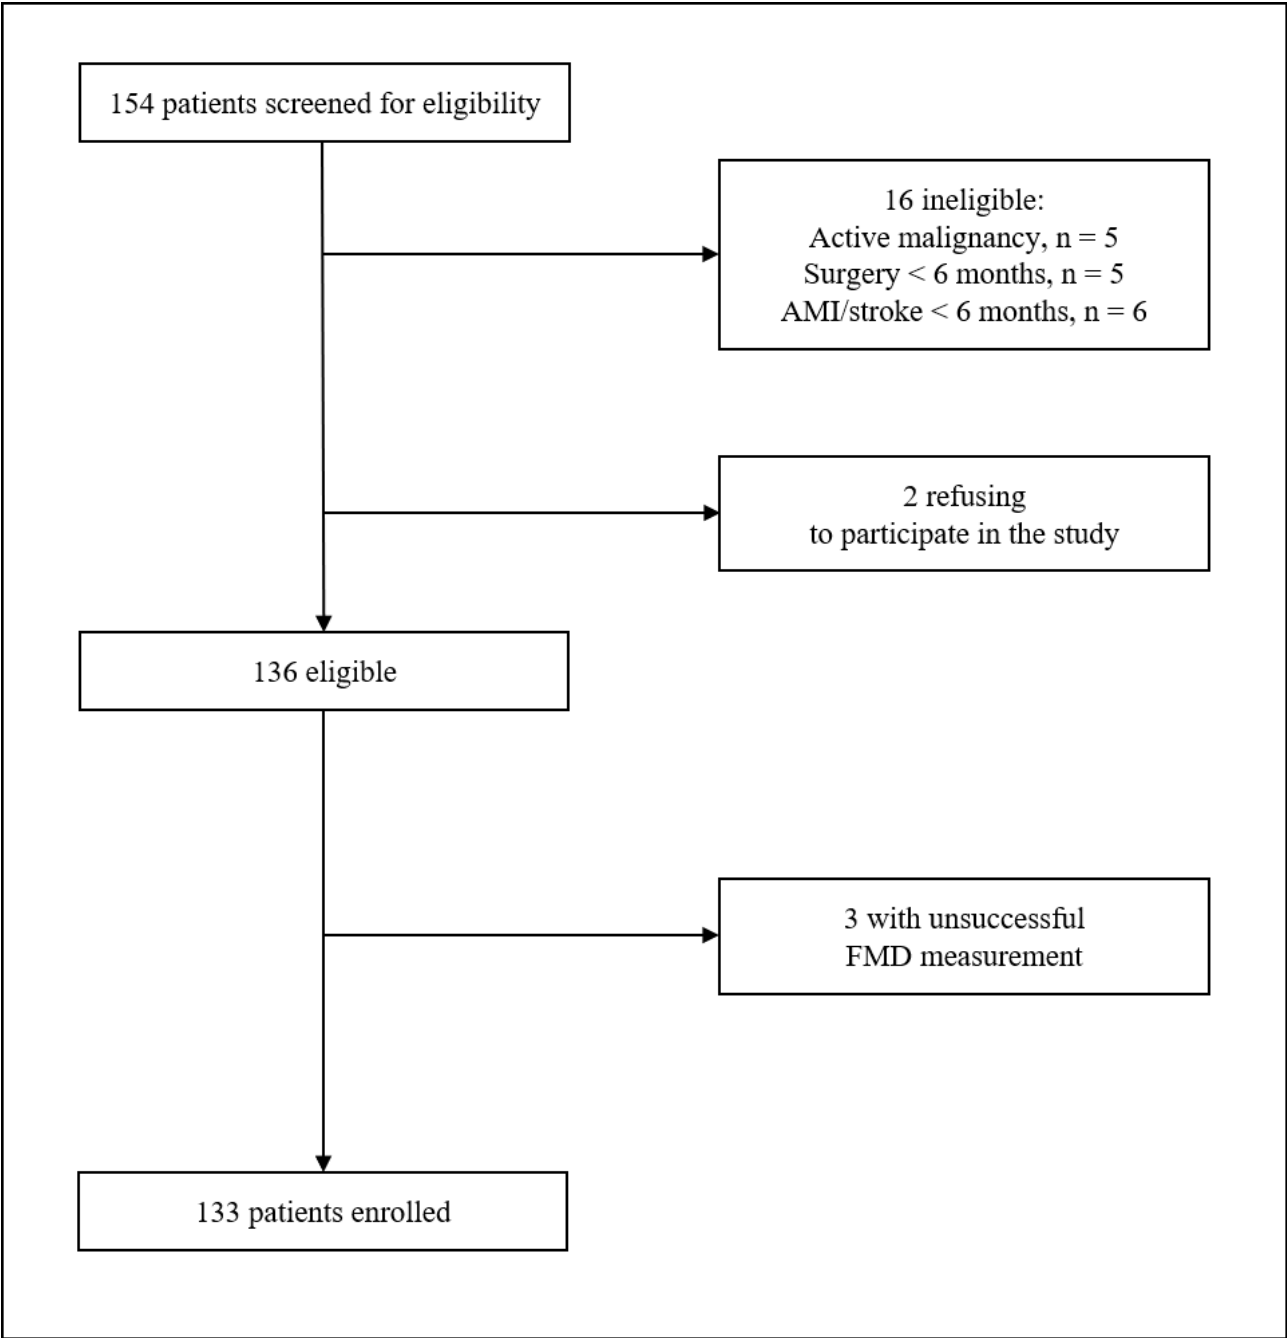

AMI: acute myocardial infarction; FMD: flow-mediated dilation.
